# Supplementary material
Source: publisher figshare collection journal article supplement (https://acs.figshare.com/ndownloader/files/14623973)
Supplement: Supplementary file 1 [file 14623973]

## Supporting Information

Hydrogen nanobubbles at roughness regulated surfaces;  
Why does the normal hydrogen electrode need a platinized-platinum electrode?

Kentarou Kashiwagi,<sup>a</sup> Tamon Hattori,<sup>a</sup> Yudai Samejima,<sup>a</sup> Naritaka Kobayashi<sup>b</sup> and  
Seiichiro Nakabayashi<sup>\*a,b</sup>

<sup>a</sup> Department of Chemistry, Graduate School of Science and Engineering, Saitama University, Shimo-okubo 255, Sakura-ku, Saitama 338-8570, Japan

<sup>b</sup> Division of Strategic Research and Development, Graduate School of Science and Engineering, Saitama University, Shimo-okubo 255, Sakura-ku, Saitama 338-8570, Japan

Figure S1

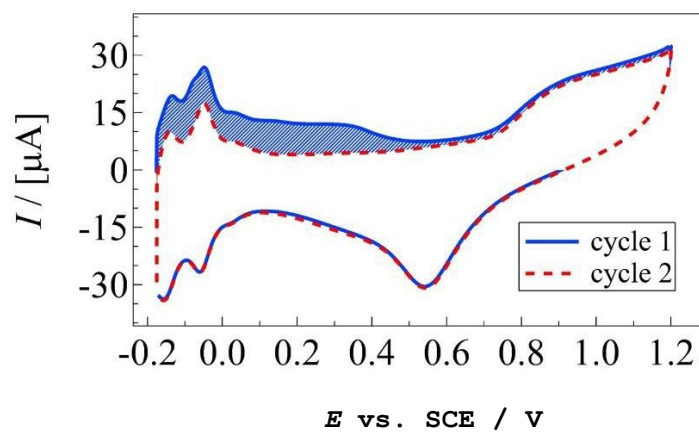

Figure S1. The first (blue line) and the second (red line) cyclic voltammograms with the potential scanning rate of 100m V/s. The electrode potential was held at -0.2 V vs. SCE for 50 s in advance to the first potential scan. The charge in the blue hatched line is attributed to the oxidation charge of the hydrogen molecules in the nanobubbles.

Figure S2

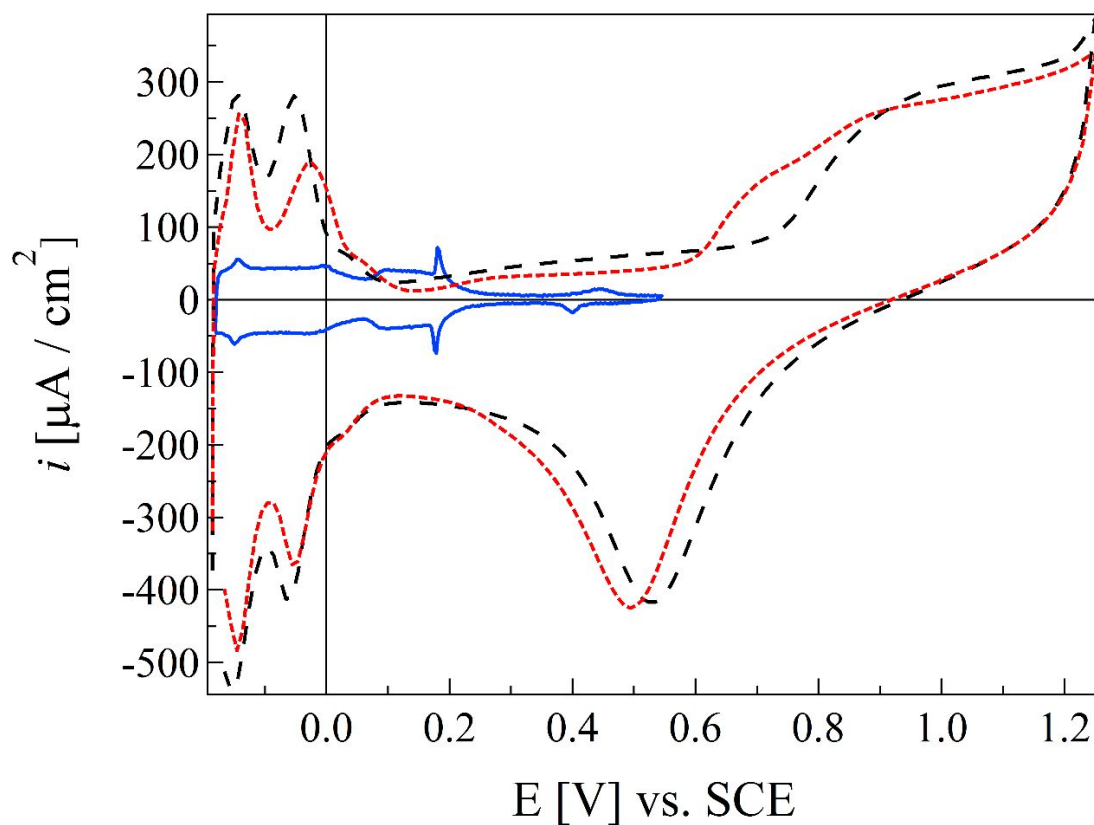

Figure S2. The cyclic voltammograms of the platinum electrodes in degassed 0.1M sulfuric acid aqueous solution. The blue line represents the CV at Pt (111). The red and black CVs are obtained at the platinized platinum electrodes. The shapes of CV are varied between the red and the black lines depending on uncontrollable difference in the electrodeposition.
